# Supplementary material for: Investigating the Genetic Profile of the Amyotrophic Lateral Sclerosis/Frontotemporal Dementia (ALS-FTD) Continuum in Patients of Diverse Race, Ethnicity and Ancestry
Source: MDPI journal article supplement (doi:10.3390/genes13010076), 2021-12-28
Supplement: s1 [file s1]

**Table S1.** Variants Detected by Gene Panel Testing on *C9orf72* Negative Patients.

| REA                  | Age at Testing | Variant                          | Interpretation    |
|----------------------|----------------|----------------------------------|-------------------|
| European Non-Finnish | 71             | TBK1 c.1341-1G>C(Splicing)       | Likely Pathogenic |
| European Non-Finnish | 61             | SOD1 c.341T>C(p.Ile114Thr)       | Pathogenic        |
| European Non-Finnish | 65             | SOD1 c.14C>T(p.Ala5Val)          | Pathogenic        |
| European Non-Finnish | 45             | SOD1 c.341T>C(p.Ile114Thr)       | Pathogenic        |
| European Non-Finnish | 47             | SOD1 c.355G>C(p.Val119Leu)       | Pathogenic        |
| European Non-Finnish | 53             | SOD1 c.341T>C(p.Ile114Thr)       | Pathogenic        |
| European Non-Finnish | 28             | FUS c.1561C>G(p.Arg521Gly)       | Pathogenic        |
| European Non-Finnish | 87             | CDH13 c.778C>G(p.Leu260Val)      | Uncertain         |
| European Non-Finnish | 89             | ARHGEF28 c.490G>A(p.Glu164Lys)   | Uncertain         |
| European Non-Finnish | 80             | VAPB c.5C>T(p.Ala2Val)           | Uncertain         |
| European Non-Finnish | 79             | ARHGEF28 c.4024G>A(p.Gly1342Arg) | Uncertain         |
| European Non-Finnish | 78             | PSEN2 c.208G>A(p.Gly70Arg)       | Uncertain         |
| European Non-Finnish | 79             | SETX c.7819G>A(p.Glu2607Lys)     | Uncertain         |
| European Non-Finnish | 74             | VCP c.374G>A(p.Gly125Asp)        | Uncertain         |
| European Non-Finnish | 73             | FUS c.1562G>A(p.Arg521His)       | Pathogenic        |
| European Non-Finnish | 71             | SOD1 c.413C>T(p.Thr138Ile)       | Likely Pathogenic |
| European Non-Finnish | 72             | SOD1 c.193T>C(p.Phe65Leu)        | Likely Pathogenic |
| European Non-Finnish | 67             | CHMP2B c.394A>G(p.Asn132Asp)     | Uncertain         |
| European Non-Finnish | 69             | GRN c.709-2A>G(Splicing)         | Pathogenic        |
| European Non-Finnish | 69             | SQSTM1 c.923C>T(p.Ala308Val)     | Uncertain         |
| European Non-Finnish | 67             | TARDBP c.941G>C(p.Gly314Ala)     | Uncertain         |
| European Non-Finnish | 66             | UBQLN2 c.1174A>G(p.Met392Val)    | Uncertain         |
| European Non-Finnish | 67             | ARHGEF28 c.133A>G(p.Met45Val)    | Uncertain         |
| European Non-Finnish | 67             | VCP c.79A>G(p.Ile27Val)          | Uncertain         |
| European Non-Finnish | 67             | CDH13 c.1894A>G(p.Ile632Val)     | Uncertain         |
| European Non-Finnish | 67             | SETX c.3029G>A(p.Arg1010His)     | Uncertain         |
| European Non-Finnish | 64             | GRN c.1664G>A(p.Arg555Gln)       | Uncertain         |
| European Non-Finnish | 61             | FUS c.676G>A(p.Gly226Ser)        | Uncertain         |
| European Non-Finnish | 65             | GRN c.328C>T(p.Arg110*)          | Pathogenic        |
| European Non-Finnish | 62             | GRN c.1224C>A(p.Tyr408*)         | Likely Pathogenic |
| European Non-Finnish | 60             | VAPB c.112C>T(p.Arg38*)          | Likely Pathogenic |
| European Non-Finnish | 60             | PSEN1 c.803T>C(p.Leu268Pro)      | Uncertain         |
| European Non-Finnish | 58             | GRN c.1402C>T(p.Gln468*)         | Pathogenic        |
| European Non-Finnish | 60             | SOD1 c.435G>C(p.Leu145Phe)       | Pathogenic        |
| European Non-Finnish | 57             | VCP c.277C>T(p.Arg93Cys)         | Likely Pathogenic |
| European Non-Finnish | 60             | GRN c.970G>A(p.Ala324Thr)        | Uncertain         |
| European Non-Finnish | 59             | TBK1 c.1566C>G(p.Ile522Met)      | Uncertain         |

|                      |    |                                       |                      |
|----------------------|----|---------------------------------------|----------------------|
| European Non-Finnish | 56 | FUS c.188A>G(p.Asn63Ser)              | Uncertain            |
| European Non-Finnish | 56 | SQSTM1 c.663G>A(p.Thr221Thr)          | Uncertain            |
| European Non-Finnish | 55 | SQSTM1 c.1129C>G(p.Leu377Val)         | Uncertain            |
| European Non-Finnish | 51 | PSEN2 c.619A>G(p.Thr207Ala)           | Uncertain            |
| European Non-Finnish | 48 | PSEN1 c.488A>G(p.His163Arg)           | Pathogenic           |
| European Non-Finnish | 45 | ANG c.379G>A(p.Val127Ile)             | Uncertain            |
| European Non-Finnish | 42 | SOD1 c.139C>G(p.His47Asp)             | Likely Pathogenic    |
| European Non-Finnish | 43 | SOD1 c.14C>T(p.Ala5Val)               | Pathogenic           |
| European Non-Finnish | 39 | TREM2 c.313delG(p.Ala105Argfs*84)     | Pathogenic           |
| European Non-Finnish | 34 | SOD1 c.20G>T(p.Cys7Phe)               | Pathogenic           |
| European Non-Finnish | 26 | FUS c.1574C>G(p.Pro525Arg)            | Uncertain            |
| European Non-Finnish | 84 | TBK1 c.871A>G(p.Lys291Glu)            | Uncertain            |
| European Non-Finnish | 78 | SOD1 c.272A>C(p.Asp91Ala)             | Likely Pathogenic    |
| European Non-Finnish | 71 | FUS c.681_686del6(p.Gly230_Gly231del) | Suspected Pathogenic |
| European Non-Finnish | 67 | TBK1 c.65dupA(p.Asn22Lysfs*8)         | Likely Pathogenic    |
| European Non-Finnish | 67 | SOD1 c.272A>C(p.Asp91Ala)             | Likely Pathogenic    |
| European Non-Finnish | 66 | SOD1 c.435G>C(p.Leu145Phe)            | Pathogenic           |
| European Non-Finnish | 65 | SOD1 c.14C>T(p.Ala5Val)               | Pathogenic           |
| European Non-Finnish | 64 | TBK1 c.358+3A>G(Intronic)             | Uncertain            |
| European Non-Finnish | 45 | VCP c.572G>A(p.Arg191Gln)             | Pathogenic           |
| European Non-Finnish | 40 | SOD1 c.115C>G(p.Leu39Val)             | Likely Pathogenic    |
| European Non-Finnish | 37 | SOD1 c.305A>G(p.Asp102Gly)            | Pathogenic           |
| European Non-Finnish | 65 | PSEN1 c.337C>T(p.Leu113Leu)           | Uncertain            |
| European Non-Finnish | 55 | PSEN1 c.488A>G(p.His163Arg)           | Pathogenic           |
| European Non-Finnish | 73 | FUS c.*64T>G(Post-Coding)             | Uncertain            |
| European Non-Finnish | 68 | ARHGEF28 c.250A>G(p.Met84Val)         | Uncertain            |
| European Non-Finnish | 57 | SOD1 c.403A>C(p.Ser135Arg)            | Likely Pathogenic    |
| European Non-Finnish | 86 | SETX c.472T>G(p.Leu158Val)            | Uncertain            |
| European Non-Finnish | 76 | ARHGEF28 c.1717C>T(p.Arg573Cys)       | Uncertain            |
| European Non-Finnish | 70 | MAPT c.1822G>A(p.Gly608Arg)           | Uncertain            |
| European Non-Finnish | 65 | MAPT c.2014G>A(p.Val672Met)           | Pathogenic           |
| European Non-Finnish | 65 | ARHGEF28 c.4992G>A(p.Pro1664Pro)      | Uncertain            |
| European Non-Finnish | 61 | CDH13 c.1240G>C(p.Glu414Gln)          | Uncertain            |
| European Non-Finnish | 62 | MAPT c.1920+29G>A(Intronic)           | Uncertain            |
| European Non-Finnish | 63 | ANXA11 c.858+1G>A(Splicing)           | Uncertain            |
| European Non-Finnish | 61 | SOD1 c.169+52_169+58del(Intronic)     | Uncertain            |
| European Non-Finnish | 57 | MAPT c.1907C>T(p.Pro636Leu)           | Pathogenic           |
| European Non-Finnish | 56 | ANG c.122A>T(p.Lys41Ile)              | Uncertain            |
| European Non-Finnish | 33 | PSEN2 c.389C>T (p.Ser130Leu)          | Uncertain            |
| European Non-Finnish | 77 | SOD1 c.169+52_169+58del(Intronic)     | Uncertain            |
| European Non-Finnish | 75 | TARDBP c.1055A.G (p.Asn352Ser)        | Pathogenic           |

|                      |    |                                     |                   |
|----------------------|----|-------------------------------------|-------------------|
| European Non-Finnish | 40 | SOD1 c.413C>T(p.Thr138Ile)          | Likely Pathogenic |
| European Non-Finnish | 79 | TARDBP c.881G>T(p.Gly294Val)        | Likely Pathogenic |
| European Non-Finnish | 54 | PSEN1 c.488A>G(p.His163Arg)         | Pathogenic        |
| European Non-Finnish | 20 | CDH13 c.1609C>G(p.Leu537Val)        | Uncertain         |
| European Non-Finnish | 57 | PSEN1 c.525C>G(p.Phe175Leu)         | Uncertain         |
| European Finnish     | 58 | SOD1 c.272A>C(p.Asp91Ala)           | Likely Pathogenic |
| European Non-Finnish | 68 | FUS c.1181G>A(p.Arg394His)          | Uncertain         |
| Other                | 56 | GRN c.396_397insG(p.Cys133Valfs*27) | Likely Pathogenic |
| Other                | 64 | SOD1 c.412A>G(p.Thr138Ala)          | Pathogenic        |
| Other                | 70 | MAPT c.1907C>T (p.Pro636Leu)        | Pathogenic        |
| Other                | 49 | CHMP2B c.464A>G(p.Asp155Gly)        | Uncertain         |
| Other                | 66 | TARDBP c.395T>C(p.Met132Thr)        | Uncertain         |
| Other                | 49 | VCP c.1202A>G(p.Asn401Ser)          | Uncertain         |
| Other                | 53 | SQSTM1 c.547C>T(p.Arg183Cys)        | Uncertain         |
| East Asian           | 66 | TARDBP c.1135T>C(p.Ser379Pro)       | Pathogenic        |
| East Asian           | 51 | ARHGEF28 c.5191C>T(p.Leu1731Phe)    | Uncertain         |
| South Asian          | 58 | HNRNPA2B1 c.907T>C(p.Phe303Leu)     | Uncertain         |
| South Asian          | 39 | ARHGEF28 c.5096C>T(p.Ala1699Val)    | Uncertain         |
| Mixed Non-European   | 65 | PSEN1 c.617G>C(p.Gly206Ala)         | Pathogenic        |
| Mixed Non-European   | 84 | SQSTM1 c.328C>T(p.Arg110Cys)        | Uncertain         |
| African              | 71 | SOD1 c.124G>A(p.Gly42Ser)           | Pathogenic        |
| African              | 53 | ARHGEF28 c.3533A>G(p.Asn1178Ser)    | Uncertain         |
| African              | 48 | SOD1 c.301G>A(p.Glu101Lys)          | Likely Pathogenic |
| African              | 47 | SOD1 c.301G>A(p.Glu101Lys)          | Likely Pathogenic |
| African              | 45 | SOD1 c.420C>A(p.Asn140Lys)          | Likely Pathogenic |
| Latino               | 67 | MAPT c.1915G>A(p.Gly639Ser)         | Likely Pathogenic |
| Latino               | 39 | SOD1 c.68A>T(p.Gln23Leu)            | Pathogenic        |
